# Supplementary material for: Temporal characteristics of atmospheric ammonia and nitrogen dioxide over China based on emission data, satellite observations and atmospheric transport modeling since 1980
Source: Copernicus journal article supplement (doi:10.5194/acp-17-9365-2017), 2017-08-07
Supplement: Supplementary file 1 [file acp-17-9365-2017-supplement.pdf]

Supplement of Atmos. Chem. Phys., 17, 9365–9378, 2017  
<https://doi.org/10.5194/acp-17-9365-2017-supplement>  
© Author(s) 2017. This work is distributed under  
the Creative Commons Attribution 3.0 License.

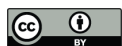

*Supplement of*

## **Temporal characteristics of atmospheric ammonia and nitrogen dioxide over China based on emission data, satellite observations and atmospheric transport modeling since 1980**

**Lei Liu et al.**

*Correspondence to:* Xiuying Zhang (lzhxy77@163.com)

The copyright of individual parts of the supplement might differ from the CC BY 3.0 License.

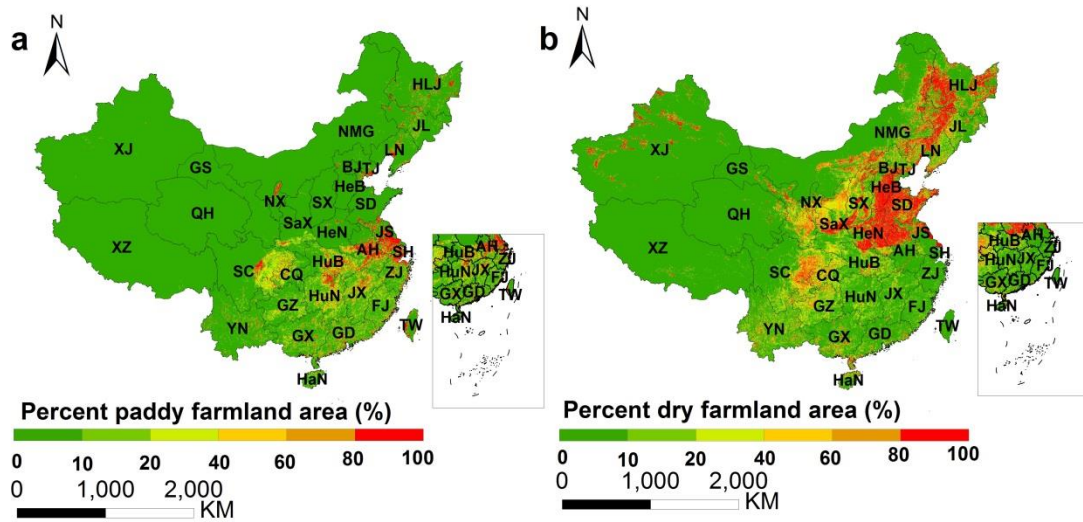

**Fig. S1.** Percent farmland area. This refers to the Tsinghua University 30 meter resolution global land cover product of 2010 (<http://data.ess.tsinghua.edu.cn>). The map was generated by using ArcGIS 10.2 software.

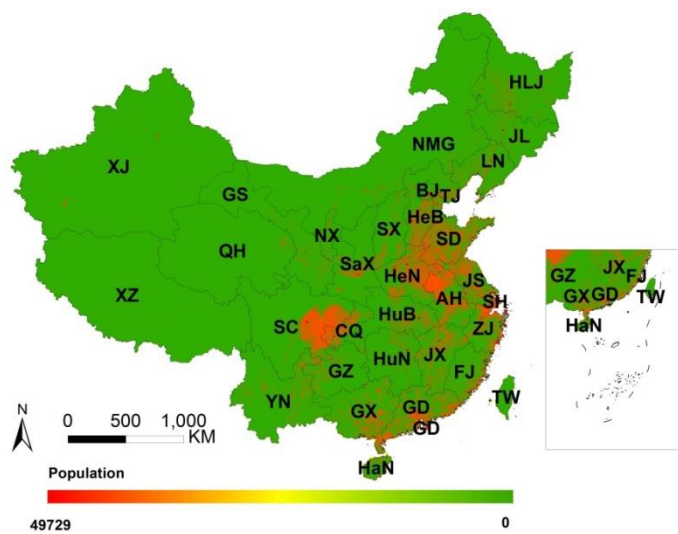

**Fig. S2.** The distribution of population (people/km<sup>2</sup>) in China in 2010.
